# Supplementary material for: Novel astrovirus and paramyxovirus in Mongolian gerbils (Meriones unguiculatus) from China
Source: PubMed Central journal article supplement — Zool Res. 2022 May 18;43(3):418–22. doi: 10.24272/j.issn.2095-8137.2021.445 (PMC9113969; doi:10.24272/j.issn.2095-8137.2021.445), 2022-05-18
Supplement: zr-43-3-418-S1.pdf [file zr-43-3-418-S1.pdf]

## Supplementary Materials

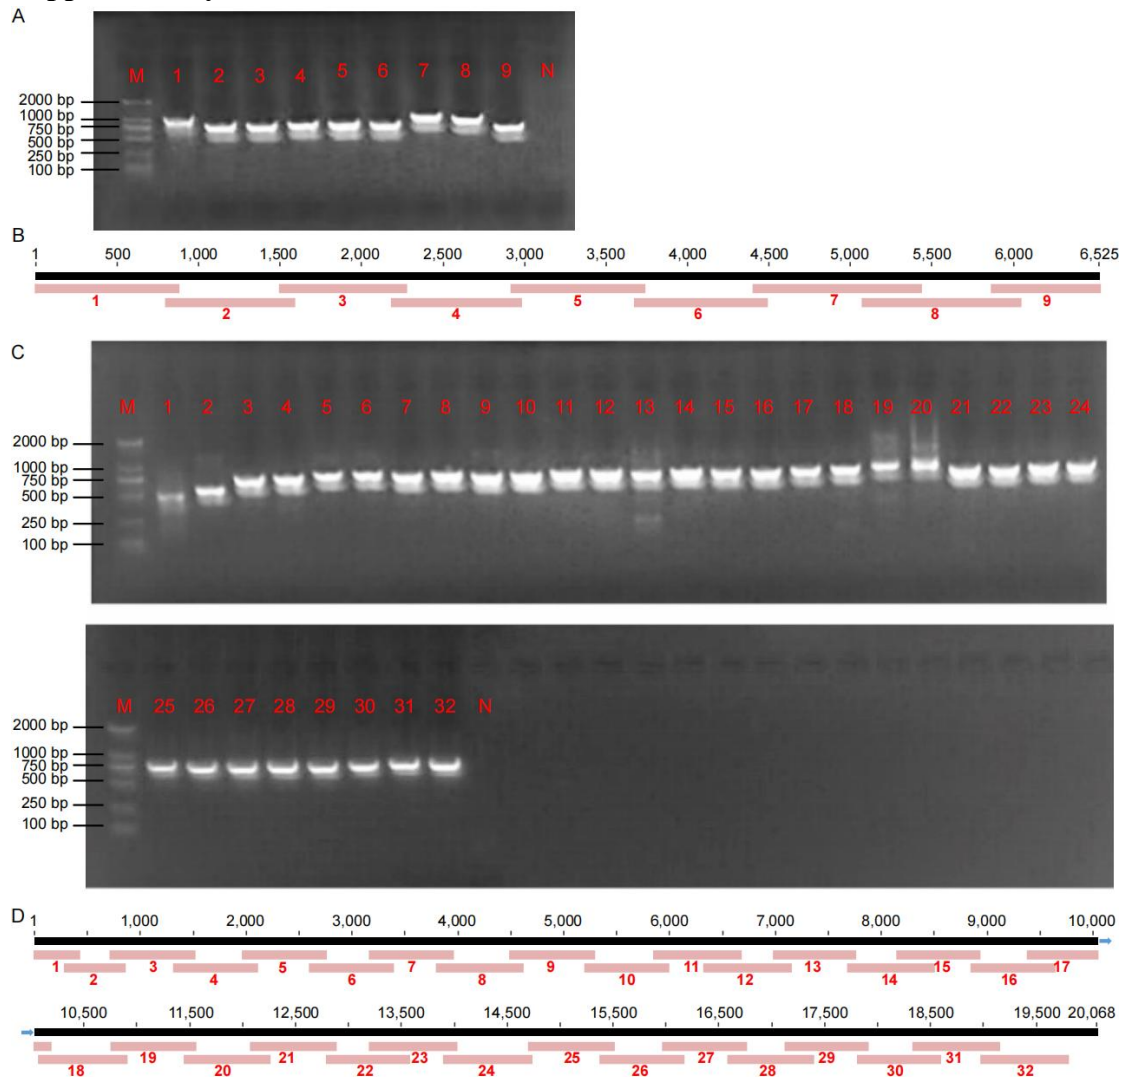

**Supplementary Figure S1. Sequence confirmation by RT-PCR and Sanger sequencing.** (A) Gel electrophoresis result showing overlapping RT-PCR confirmation for GeAstV genome. The amplicons for each pair primers have been run in sequential order. (B) Graphical view of each amplicon assembly obtained from Sanger methods for GeAstV genome. (C) Gel electrophoresis result showing overlapping RT-PCR confirmation for GePV genome. The amplicons for each pair primers have been run in sequential order. (D) Graphical view of each amplicon assembly obtained from Sanger methods for GePV genome.

**A**

|                                                                                                                     | ORF1a        | RdRp         | ORF2         |         |
|---------------------------------------------------------------------------------------------------------------------|--------------|--------------|--------------|---------|
| AVX29490 Marmot astrovirus 3                                                                                        | 37.94        | 68.77        | 29.73        |         |
| QJF11791 Grey squirrel astrovirus                                                                                   | 36.05        | 67.95        | 28.82        |         |
| QOE77535 Murine astrovirus                                                                                          | 36.47        | 70.14        | 32.39        |         |
| APA19822 Rodent astrovirus                                                                                          | 41.07        | 68.49        | 30.89        |         |
| APA19831 Rodent astrovirus                                                                                          | 38.68        | 68.22        | 30.08        |         |
| APA19843 Rodent astrovirus                                                                                          | 39.51        | 70.96        | 31.09        |         |
|  <b>QNJ35016 Rodent astrovirus</b> | <b>42.14</b> | 69.32        | <b>35.94</b> | Rodent  |
|  <b>ART85572 Mamastrovirus 4</b>   | 38.83        | <b>75.07</b> | 30.60        | Porcine |
| ARU76986 Mamastrovirus 4                                                                                            | 38.47        | 72.05        | 32.12        |         |
| QPM92607 Pig astrovirus CX1                                                                                         | 38.80        | 72.60        | 31.41        |         |
| QNJ99354 Rodent astrovirus                                                                                          | 38.47        | 72.34        | 30.42        |         |
| QDH76153 Bovine astrovirus                                                                                          | 38.19        | 71.51        | 30.76        |         |

**B**

|                                | N            | P            | M            | F            | SH           | TM           | G            | L            |
|--------------------------------|--------------|--------------|--------------|--------------|--------------|--------------|--------------|--------------|
| Beilong virus                  | 58.74        | 54.25        | <b>82.35</b> | 72.43        | 50.00        | <b>28.57</b> | 60.17        | 76.26        |
| Tailam virus                   | <b>59.56</b> | 53.04        | 81.18        | 71.79        | <b>56.58</b> | 27.80        | <b>61.29</b> | <b>77.04</b> |
| Rodent paramyxovirus           | 59.02        | <b>56.35</b> | 80.00        | <b>73.13</b> | 39.24        | 24.32        | 60.03        | 75.39        |
| Pohorje myodes paramyxovirus 1 | 52.59        | 45.42        | 74.12        | 69.30        | 22.62        | 22.31        | 55.96        | 72.64        |
| Jun jeilongvirus               | 45.63        | 46.56        | 79.12        | 69.67        | <b>16.05</b> | 23.85        | 46.69        | 72.37        |
| Mount Mabu Lophuromys virus 2  | 49.87        | 36.23        | 77.06        | 59.60        |              | 21.35        | 41.14        | 67.76        |
| Mount Mabu Lophuromys virus 1  | <b>37.12</b> | 29.18        | 69.23        | <b>51.56</b> |              | 15.04        | 31.48        | 60.61        |
| Feline paramyxovirus           | 44.81        | 31.28        | 69.14        | 54.24        |              | 14.13        | <b>28.04</b> | 60.77        |
| Ruloma virus                   | 41.84        | <b>21.16</b> | <b>66.47</b> | 51.63        |              | <b>11.71</b> | 29.90        | 55.74        |

**Supplementary Figure S2. Pairwise amino acid similarities between representative strains and GeAstV and GePV, respectively.** (A) Pairwise amino acid similarities between GeAstV and representative strains. (B) Comparison of sequence similarity based on amino acid sequences of the eight ORFs between GePV and nine paramyxoviruses from the genus *Jeilongvirus*.

**Supplementary Table S1.** Summary of the meta-transcriptomic sequence libraries used in this study.

| Group ID     | Library ID         | Organ  | Individuals | Total raw reads | Reads(RPM)  |             |
|--------------|--------------------|--------|-------------|-----------------|-------------|-------------|
|              |                    |        |             |                 | GeAstV      | GePV        |
| <b>DB01</b>  | CL100105264_L01_68 | Lung   | 10          | 113,817,000     | 1,629(14)   |             |
| <b>DB01</b>  | CL100105264_L01_69 | Kidney | 10          | 78,417,434      |             |             |
| <b>DB01</b>  | CL100105264_L01_70 | Brain  | 10          | 123,766,012     |             |             |
| <b>DB02</b>  | CL100105264_L01_1  | Kidney | 10          | 140,534,218     |             |             |
| <b>DB02</b>  | CL100105264_L01_71 | Liver  | 10          | 136,371,344     |             |             |
| <b>DB02</b>  | CL100105264_L01_72 | Lung   | 10          | 136,369,758     |             |             |
| <b>DB02</b>  | CL100105270_L02_2  | Brain  | 10          | 150,142,220     |             |             |
| <b>DB03</b>  | CL100105264_L02_74 | Liver  | 10          | 175,355,292     |             |             |
| <b>DB03</b>  | CL100105264_L02_75 | Lung   | 10          | 154,954,496     | 43,472(281) |             |
| <b>DB03</b>  | CL100105264_L02_76 | Kidney | 10          | 129,071,668     |             | 1,630(13)   |
| <b>DB03</b>  | CL100105264_L02_77 | Brain  | 10          | 162,219,268     |             |             |
| <b>DB04</b>  | CL100105264_L02_1  | Brain  | 10          | 168,271,754     |             |             |
| <b>DB04</b>  | CL100105264_L02_78 | Liver  | 10          | 148,987,300     |             |             |
| <b>DB04</b>  | CL100105264_L02_79 | Lung   | 10          | 168,931,082     |             |             |
| <b>DB04</b>  | CL100105264_L02_80 | Kidney | 10          | 137,583,002     |             | 11,778(86)  |
| <b>*SX04</b> | CL100125473_L01_43 | Kidney |             | 62,583,426      |             | 16,486(263) |
| <b>*SX07</b> | CL100125473_L01_2  | Kidney |             | 64503350        |             | 798(12.37)  |
| <b>*SX10</b> | CL100105270_L02_3  | Kidney |             | 128785198       |             | 2349(18.24) |
| <b>*SX11</b> | CL100105270_L02_58 | Kidney |             | 148714314       |             | 856(5.76)   |

\*From previous meta-transcriptomic library [BioSample accession: SAMN20352314, SAMN20352323, SAMN20352335 and SAMN20352338, respectively].

**Supplementary Table S2.** Overlapping primer sequences used for genome confirmation

| Virus  | Order      | Primer ID              | Primer sequence(5'-3')       | Size (bp) |
|--------|------------|------------------------|------------------------------|-----------|
| GeAstV | 1          | GeAstV-1F              | CAGCAGGATGGTGCCTGCT          | 872       |
|        |            | GeAstV-908R            | GGCAGATTGTAAGCACTGGTTC       |           |
|        |            | GeAstV-1089R           | GCTATCCGCCAGACAGCAAG         |           |
|        | 2          | LA-642F_1K1            | TTGGTGGACACCGTTTGGAT         | 780       |
|        |            | LA-1693R_1K1           | TCGAACAGCACCACCAGTAT         |           |
|        |            | LA-787F_2K1            | TGCTGTGAGTGGTGCTAAGTT        |           |
|        |            | LA-1596R_2K1           | GTGGGCGTTGCATATGAGTA         |           |
|        | 3          | LA-1319F_1K2           | TACATTGTTACTGCGGGGCA         | 771       |
|        |            | LA-2397R_1K2           | ACAAGTGCACGATCCATTGC         |           |
|        |            | LA-1483F_2K2           | AAAGAGGGACTGCACTTGGG         |           |
|        |            | LA-2283R_2K2           | TGAAGCAATTGGCGAACGTC         |           |
|        | 4          | LA-2077F_1K3           | TCGTAGGTTAGCGGAGGAGA         | 787       |
|        |            | LA-3084R_1K3           | GCAAGCACCAATACGAGCAT         |           |
|        |            | LA-2161F_2K3           | TGAGGAGGATTGGTTTGGGAAG       |           |
|        |            | LA-2986R_2K3           | AGCAATACCACAAAACAGGAGG       |           |
|        | 5          | LA-2845F_1K4           | GTTCAATCAACACCTGCTTATCCA     | 812       |
|        |            | LA-3883R_1K4           | GCACCGATGTTGTAGCAAGAC        |           |
|        |            | LA-2906F_2K4           | ACCATTTTGGTTGGCTTCCC         |           |
|        |            | LA-3746R_2K4           | AACCCAGCAAACAACCTTTTCACA     |           |
|        | 6          | LA-3608F_1K5           | AGGATGTCTTTGGTATGTGGGT       | 805       |
|        |            | LA-4616R_1K5           | AGCCACCCATACAATCTGCT         |           |
|        |            | LA-3665F_2K5           | TTGGTCTCACCTTTTGTGGC         |           |
|        |            | LA-4498R_2K5           | AGCATGTTTCCTAGCACCCAA        |           |
|        | 7          | LA-4363F_1K6           | TGAGCGGCTTTCCATTAGGT         | 1023      |
|        |            | LA-5457R_1K6           | AGCTGATAAGTGGTGGCTGAG        |           |
|        | 8          | LA-5050F_1K7           | AGGCTCCATTGTTTACCGTGT        | 967       |
|        |            | LA-6086R_1K7           | AGAGAGCCAGACGCTCAATC         |           |
| 9      | As-5,728 F | CATGGTTATGGAGAGGGATG   | 657                          |           |
|        | As-5,826 F | CCCAGGGTGCTTACTATATTAC |                              |           |
| GePV   | 1          | pv-RT2                 | GGGATAATTGAGCCGTAGTCACT      | 412       |
|        |            | pv-RT3                 | TGTCCAGATGAACCCTGAGATG       |           |
|        |            | pv-R1                  | GCCACCTTCTGCCATTCTGATGATCTCT |           |
|        |            | pv-R2                  | CCATGTCTCTCCCTCGAGCAACAAGC   |           |
|        | 2          | PV-5-1K34F             | GCAGCGCTTTCATTTATGACA        | 555       |
|        |            | PV-5-2K34F             | CTTGCATGGTCAGTTCGTTTTCAT     |           |
|        |            | PV-5-1K34R             | AGTTAAGAAGAAGCCTGCGAGAC      |           |
|        |            | PV-5-2K34R             | ATCAGCTCCAAGATTCTGGCT        |           |
|        | 3          | KP-516F_1K1            | AGTGACTACGGCTCAATTATCCC      | 784       |
|        |            | KP-1531R_1K1           | GCTGGTTTCCCTTTGTCTGC         |           |

|    |               |                           |     |
|----|---------------|---------------------------|-----|
|    | KP-679F_2K1   | GAGCAGACGCTGATTACAAGC     |     |
|    | KP-1488R_2K1  | CTCTGAGAGGTGTGTACGGG      |     |
| 4  | KP-1152F_1K2  | TACAACCTAGGCGTTGGGATG     | 771 |
|    | KP-2175R_1K2  | CTCCTTCGCTCTCGCTTTTG      |     |
|    | KP-1277F_2K2  | TCAAACAAGTGGAGGACCGA      |     |
|    | KP-2079R_2K2  | ACGCGTGCATCCTGTTTCT       |     |
| 5  | KP-1777F_1K3  | CCAAGCTCAATTAACACCTCCA    | 784 |
|    | KP-2816R_1K3  | TGCAGACGAGTCACTTTGGT      |     |
|    | KP-1924F_2K3  | TCTCCATGACAAGCTACAGCA     |     |
|    | KP-2734R_2K3  | GAAGTGGGCTGGTGTAAACAGTA   |     |
| 6  | KP2484F_1K4-2 | GCTGTTAACATCCGGAACGC      | 779 |
|    | KP3540R_1K4-2 | ATAAGAAGTCTGCGGTGCCA      |     |
|    | KP2552F_2K4-2 | GCATCGTAGACTTCGAGGGA      |     |
|    | KP3373R_2K4-2 | GAGCTTCGGAGGATCCTGTA      |     |
| 7  | KP-3002F_1K5  | ACCTGGTTCAGGGAAAAATGAGA   | 780 |
|    | KP-4036R_1K5  | TTGTAAATCCCGGCGTCTGT      |     |
|    | KP-3121F_2K5  | TGGAAGACCTGAACATTGATAACC  |     |
|    | KP-3933R_2K5  | TTGCTGGAAAGATTGCTCCTG     |     |
| 8  | KP-3654F_1K6  | GAACAGCAGGAAATCAGCAGG     | 799 |
|    | KP-4699R_1K6  | TCGTGTTCAATTGTGTTCCGT     |     |
|    | KP-3760F_2K6  | TTGGCAAATCAACCTCTGCC      |     |
|    | KP-4588R_2K6  | ACTTTTGGGCAATGTACAGGT     |     |
| 9  | KP-4301F_1K7  | GTGGGCTTAGCCTTCATGTG      | 785 |
|    | KP-5337R_1K7  | ATTCTCTACGACCCCAGTTGT     |     |
|    | KP-4449F_2K7  | GTGTTGCAGCCATCTGTTCC      |     |
|    | KP-5263R_2K7  | ACAATATGCTGATATGTCACCTGAG |     |
| 10 | KP-4986F_1K8  | CTGGCTTACATCTGAAATCCTCA   | 775 |
|    | KP-6074R_1K8  | CCCCGAACTAACAACCTGGAGA    |     |
|    | KP-5159F_2K8  | TGTCACGCCTCAGTTAGCAT      |     |
|    | KP-5963R_2K8  | AGTAAGCAAAGACGGGTACTCT    |     |
| 11 | KP-5758F_1K9  | GGGCCAAATTTAAGAGACCCC     | 819 |
|    | KP-6760R_1K9  | AGCCTTAACCCAAGAAACCAGA    |     |
|    | KP-5810F_2K9  | TGGAGATTTTGACTCCATGTTGA   |     |
|    | KP-6655R_2K9  | AGATAAACAAGCCAAACAAGCGT   |     |
| 12 | KP-6144F_1K10 | CACCAGCACCCCATTAGTT       | 812 |
|    | KP-7181R_1K10 | CTCGTGTATATGCTGGTGGGT     |     |
|    | KP-6279F_2K10 | CGGTGCCAAGATCCACAATATAA   |     |
|    | KP-7128R_2K10 | ATTTGTAAGTGTCTGTTCCCTGCAA |     |
| 13 | KP-6804F_1K11 | CTTAACCCTGTACGGTACTGCT    | 760 |
|    | KP-7873R_1K11 | ACTTGTCTCCAATCTTATCCCCT   |     |
|    | KP-6932F_2K11 | AAATCAGGATCATGGAACGGGA    |     |
|    | KP-7731R_2K11 | TGAGTAATAAATCCCTGCCTCTCT  |     |
| 14 | KP-7491F_1K12 | TAGGAGGGAGTTAGGTCGCA      | 804 |

|    |                |                           |     |
|----|----------------|---------------------------|-----|
|    | KP-8530R_1K12  | GGTTGTGTGCTGCTAACTGG      |     |
|    | KP-7641F_2K12  | GGCTTGTGACAAGGGATCA       |     |
|    | KP-8476R_2K12  | CAATGGACGACCCTTTGAGC      |     |
|    | KP8070F_1K13-2 | TCAAGCGACACTTCAGTTGC      |     |
| 15 | KP9072R_1K13-2 | AGCTACCTGGTTTTGTTGATCCT   | 773 |
|    | KP8105F_2K13-2 | AACAAAGAACAGTGCTCCCAC     |     |
|    | KP8927R_2K13-2 | ATTCTCTGCAATTGGACAAATGGT  |     |
|    | KP8720F_1K14-2 | TCAAGAATCACTCGCTGGCT      |     |
| 16 | KP9723R_1K14-2 | CGAATGGTCCCTTGTGACAGT     | 775 |
|    | KP8806F_2K14-2 | TGGTAAGTTACAACATCCCTGC    |     |
|    | KP9612R_2K14-2 | GGGGTTTTTGTGCCTGGTTAC     |     |
|    | KP-9200F_1K15  | GGGTGGCCGACAGTAATCAT      |     |
| 17 | KP-10282R_1K15 | AATCACCCTGTCCCCTGTT       | 793 |
|    | KP-9342F_2K15  | GTGAACTCGGAGGGTACTAGC     |     |
|    | KP-10166R_2K15 | TGTAGCAGGGCTTAACTCGAT     |     |
|    | KP-9924F_1K16  | TCCAAGAGAATGTGTCCTGGAG    |     |
| 18 | KP-10934R_1K16 | CTTGTCCCTCAGGTTGGGACT     | 819 |
|    | KP-10033F_2K16 | TCAATTCCACTTCTAGACTGACAGA |     |
|    | KP-10875R_2K16 | TCTTCCGTTTCTAGTGTTTCATCG  |     |
|    | KP-10612F_1K17 | CCGGAAGATCCTGGGATGAC      |     |
| 19 | KP-11622R_1K17 | AGTGCTGGAGATGGGATTCCG     | 786 |
|    | KP-10720F_2K17 | TGATTGACAACATGAGTCACCAAA  |     |
|    | KP-11537R_2K17 | GGTCTGGCTATTTTGGGGGT      |     |
|    | KP-11293F_1K18 | CTCAAACCCACGGCAACAAA      |     |
| 20 | KP-12304R_1K18 | ATACTGATTCATCCCCGTCCC     | 795 |
|    | KP-11413F_2K18 | CCCAAATATGCACATCCGCC      |     |
|    | KP-12244R_2K18 | CCTTCGCCTATAACCTTCGAATC   |     |
|    | KP-12053F_1K19 | CATGTGACGGGGTAGTGTCA      |     |
| 21 | KP-13086R_1K19 | GGACCAGTCTTGTGTCCTAAGT    | 794 |
|    | KP-12053F_2K19 | CATGTGACGGGGTAGTGTCA      |     |
|    | KP-13086R_2K19 | ACCAGTTCCAAACACCTATCCA    |     |
|    | KP-12625F_1K20 | GACGGGAATTACGCAAGTTGG     |     |
| 22 | KP-13632R_1K20 | TGCTAAAGACAGGACAGAGGT     | 769 |
|    | KP-12748F_2K20 | GTGCAACAGTTCCTCATTGG      |     |
|    | KP-13549R_2K20 | GCATAGGGATAAGGGACTGGA     |     |
|    | KP-13069F_1K21 | AGGACACAAGACTGGTCCTAATC   |     |
| 23 | KP-14081R_1K21 | TACCCACGAGTCCTAAAATTGGT   | 805 |
|    | KP-13165F_2K21 | ATTGATGTAGAGCCCTGATCACC   |     |
|    | KP-13996R_2K21 | CAGACATCACAGAACATGAGCAC   |     |
|    | KP-13769F_1K22 | TCATGGAAGGGAGTAACTGGTAT   |     |
| 24 | KP-14809R_1K22 | ACACCTCAACAAGTCTACGGG     | 818 |
|    | KP-13165F_2K22 | CACAGAGGTGATTGCTGATACA    |     |
|    | KP-13996R_2K22 | AGGTGCAATCGCAGCTAAAG      |     |

|    |                 |                           |     |
|----|-----------------|---------------------------|-----|
|    | KP-14573F_1K23  | CTTGCGCAGCAAACCTGTGA      |     |
| 25 | KP-15595R_1K23  | CTTGACTACGGCAGCGATCT      | 793 |
|    | KP-14655F_2K23  | ACACTTGATGAAGACCTCACTATG  |     |
|    | KP-15491R_2K23  | ACCTTCTATTCCACCCATTGGA    |     |
| 26 | KP-15336F_2K24  | CCAGGTTTCTTCTCGTGGCT      | 774 |
|    | KP-16145R_2K24  | TGCTGTTACAGGGTCACCAA      |     |
|    | KP-15244F_1K24  | ACAATGAGCACATTTTTAACCACTG |     |
|    | KP-16282R_1K24  | TAGAGTATGGGTCGCTTGCC      |     |
| 27 | KP-15911F_2K25  | AGGTTTTAGTCGGTGGGTCG      | 775 |
|    | KP-16732R_2K25  | TAAATGGGACGACCCTGTGT      |     |
|    | KP-158721F_1K25 | CAAGATCAGCTTGACGCAACA     |     |
|    | KP-16946R_1K25  | TCACTCCTCTCCTCTGTTGTAGA   |     |
| 28 | KP-16547F_2K26  | AGGACTGAGGCCTAGATTGGT     | 795 |
|    | KP-17368R_2K26  | TGCTCAACATGCAAGTGGTAT     |     |
|    | KP-16447F_1K26  | ATACCTAGAGCAGCTCATGAAATC  |     |
|    | KP-17452R_1K26  | CCCTAAGTACTGGTGGTGGC      |     |
| 29 | KP-17086F_2K27  | AGTTGAAGGCCATAACACCCAT    | 767 |
|    | KP-17891R_2K27  | TCTCCTGAACACTCTTGGATGA    |     |
|    | KP-16927F_1K27  | ACAACAGAGGAGAGGAGTGAGA    |     |
|    | KP-18000R_1K27  | ACAGCTCCTTGTGACGCAAATC    |     |
| 30 | KP-17767F_2K28  | ATTACAGGAGGCCACAAGGG      | 764 |
|    | KP-19238R_2K28  | AATGTTCCCTGGCTATGTTGTGAT  |     |
|    | KP-17590F_1K28  | GCTCAATCCTTGGCTATGACA     |     |
|    | KP-18659R_1K28  | GCACCTGATCCCTCTCCAAG      |     |
| 31 | KP18172F_1K29-1 | GTGCTGTTCTGCATAATGCTCT    | 799 |
|    | KP19238R_1K29-1 | AATGTTCCCTGGCTATGTTGTGAT  |     |
|    | KP18172F_2K29-2 | CAGAAGGGGTGCTGTAAAACAT    |     |
|    | KP19238R_2K29-2 | ACAAGGATTGCTATATGCCGGA    |     |
| 32 | KP-18933F_2K30  | TCACTCGAGAAAACACCCGA      | 812 |
|    | KP-19778R_2K30  | TGAGAGCTGATATGACCAATCCA   |     |
|    | KP-18832F_1K30  | AGCCTGAATGCACATGGGT       |     |
|    | KP-19916R_1K30  | TCGTATCCCCTGTGTGTATGT     |     |
| 33 | 1K35R           | ATCCCCTGTGTGTATGTCCAAT    | 496 |
|    | 2K35R           | TCCACCAGATCTTAACTTCTGC    |     |
|    | 1K35F           | ATCCACAAAGAGGAGACTGA      |     |
|    | 2K35F           | GAGGAGACTGATAACAGATGTC    |     |

---
